# Supplementary material
Source: publisher figshare collection journal article supplement (https://gsajournals.figshare.com/ndownloader/files/34045097)
Supplement: Supplementary file 1 [file 34045097]

**Supplementary Information**

**Methylation Quantitative Trait Loci are Largely Consistent across Disease States in Crohn’s disease**

Suresh Venkateswaran1, Hari K Somineni1,2, Varun Kilaru3,4, Seyma Katrinli4, Jarod Prince1, David T Okou1, Jeffrey S Hyams5, Lee A Denson6, Richard Kellermayer 7, Greg Gibson8, David J Cutler9, Alicia K Smith3,4**$**, Subra Kugathasan1,9**$** Karen N Conneely9**$**

Figure S1: Distribution of effect sizes (% DNA methylation change per allele) for significant SNP-CpG pairs in discovery cohort.

Figure S2: Testing the effects of previously-identified IBD SNPs and CD differentially methylated positions (DMPs) in blood and ileum.

Figure S3: Boxplots for the top SNP associated to 12 CD-associated CpGs are compared between blood and ileum.

Table S1: Characteristics of discovery and replication cohorts.

Table S2a: The blood cis- and trans- mQTLs detected in discovery cohort with 238 pediatric samples

Table S3: Genic distribution of genomic variants associated in blood cis- associations from Annovar.

Table S4: Genic distribution of CpG sites in the Illumina array and cis-mQTLs

Table S5: Distribution CpG island features in the Illumina array and cis-mQTLs

Table S6: The blood cis-mQTLs detected in replication cohort with 780 adult African American samples

Table S7: The blood cis-mQTLs tested in 164 pediatric Crohn's disease patients at baseline and follow-up

Table S8: The blood mQTLs are tested in 40 ileal biopsies from pediatric cohort

Table S9: The pathways enriched for the CpG sites that are negatively correlated mQTLs between blood and Ileum

Table S10: The details of 69 blood mQTL associations in 238 pediatric CD patients for the known IBD genomic variants from de Lange et al., Nat Genet (2017)

Table S11: The previously-identified IBD SNPs associated CPGs enriched pathways (Bonferroni < 8.21E-14)

Table S12: The pathways enriched for the CpG sites that are associated with previously-identified IBD SNPs at FDR < 0.05.

Table S13: The cis-mQTLs detected for 241 previously-identified IBD SNPs in discovery cohort with 238 pediatric samples, in CD cases only (n=164), in replication cohort with 780 adult African American samples, and in controls only (n=74) in blood.

Table S14: The blood cis-mQTLs detected for 241 previously-identified IBD SNPs in discovery cohort are tested in all ileal biopsies (n=40), in CD cases only (n=17), and in controls only (n=23).

Table S15: The cis-mQTLs detected for 1189 CD-associated CpGs in discovery cohort with 238 pediatric samples, in CD cases only (n=164), in replication cohort with 780 adult African American samples, and in controls only (n=74) in blood.

Table S16: The cis-mQTLs detected for 241 previously-identified IBD SNPs in discovery cohort are tested ileal biopsies (n=40), in CD cases only (n=17), and in controls only (n=23) in ileum.

Table S17: The disease-specific mQTLs showed negative effects between Cases (n=23) and Controls (n=23) in ileum


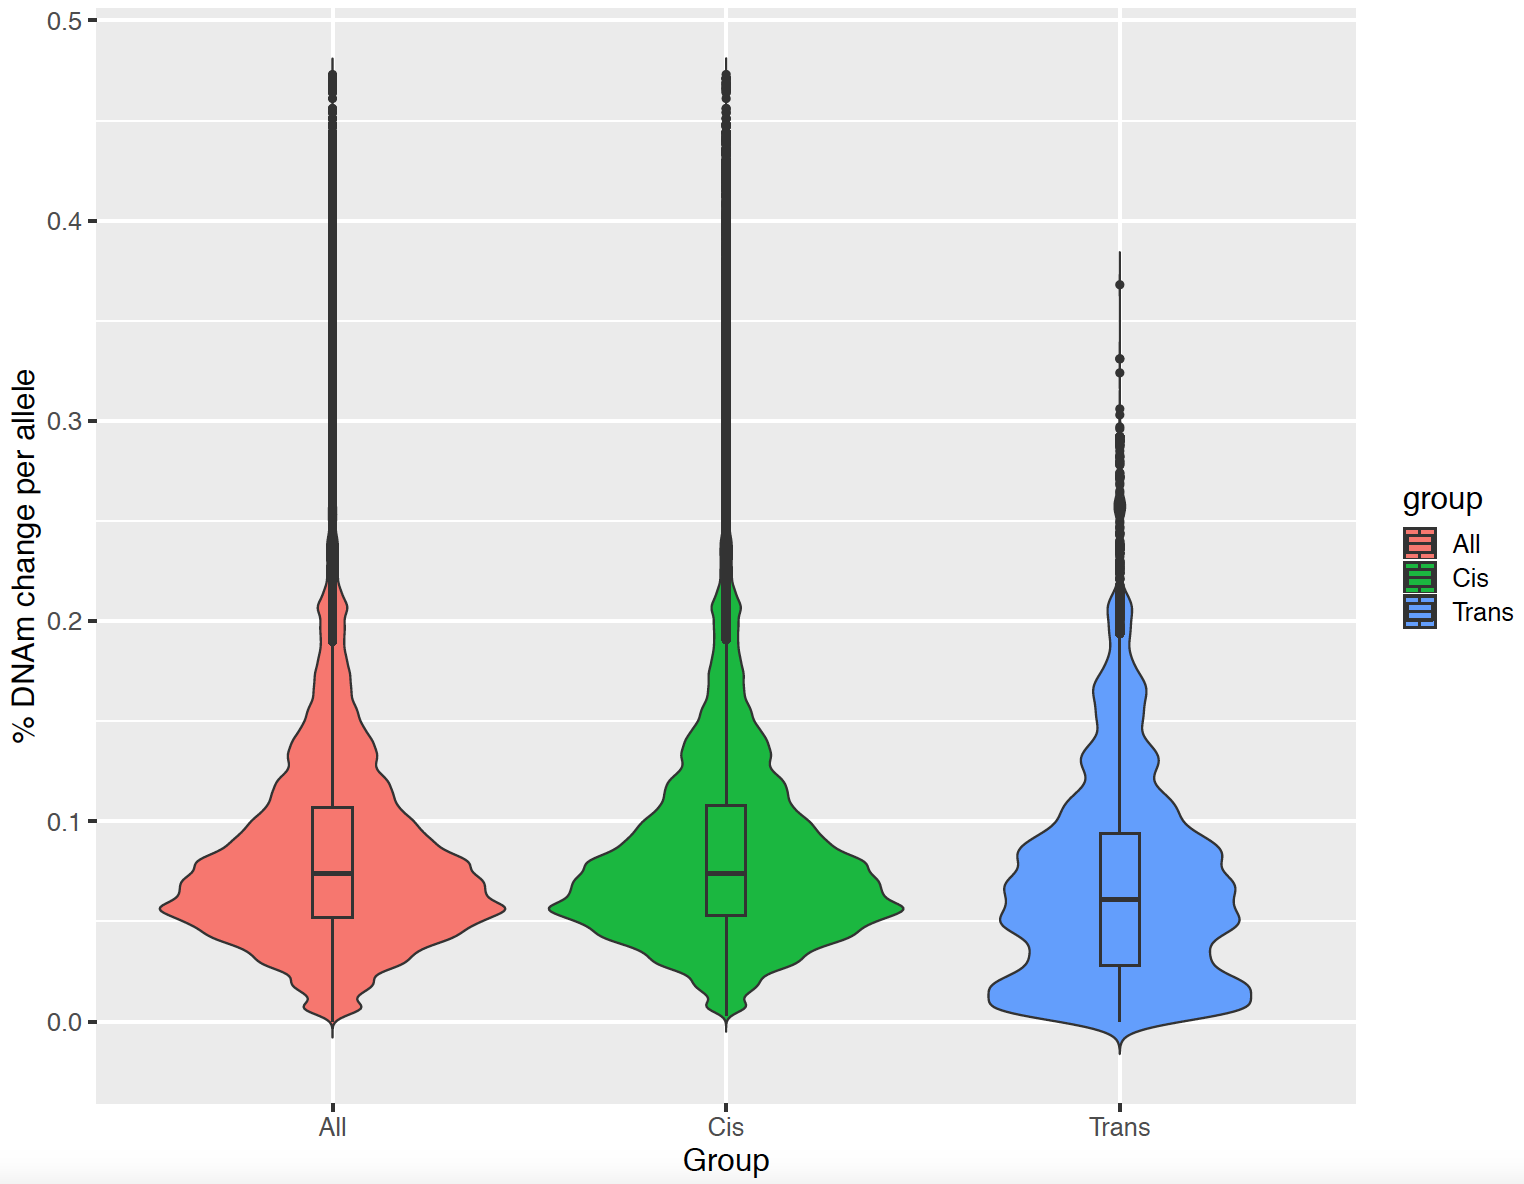


**Figure S1:** **Distribution of effect sizes (% DNA methylation change per allele) for significant SNP-CpG pairs in discovery cohort.** The y-axis shows the DNA methylation differences associated with each minor allele of genetic variants in all SNP-CpG pairs, cis- and trans-. The average effect size for cis-mQTLs was 8.7% (IQR = 5.3 – 10.8) is significantly higher than that observed for trans-mQTLs (mean = 6.9%; IQR = 2.8 – 9.4) (Mann-Whitney-Wilcoxon Test, p < 2.2e-16).

**Figure S2: Comparison of p-values and effect sizes of previously-identified IBD SNPs and CD-associated CpG sites in blood and ileum.** (A) The y-axis shows p-values for SNPs significant in an IBD GWAS (de Lange *et al*., 2017), while the x axis shows the top mQTL associations for these SNPs in the discovery cohort. Since the discovery cohort is highly enriched with CD samples, the points are color coded based on p-values from a similar GWAS of CD (de Lange *et al*., 2017). (B) The y-axis shows EWAS p-values of CD significant CpGs from Somineni et al., (2019), while the x-axis shows the top mQTL associations for these CpGs in the discovery cohort. (C) Effect sizes of 69 SNP-CpG associations from 37 previously-identified IBD SNPs are plotted between blood and ileum. (D) Effect sizes of 565 SNP-CpG associations from 22 previously-identified IBD CpG sites are compared between blood and ileum. In both figure c and d, the maroon color indicates that the associations are Bonferroni-significant in blood (*P*=8.21x10-14) and nominally significant in ileum (*P* < 0.05), whereas the gray indicates the associations that are significant only in blood.

| 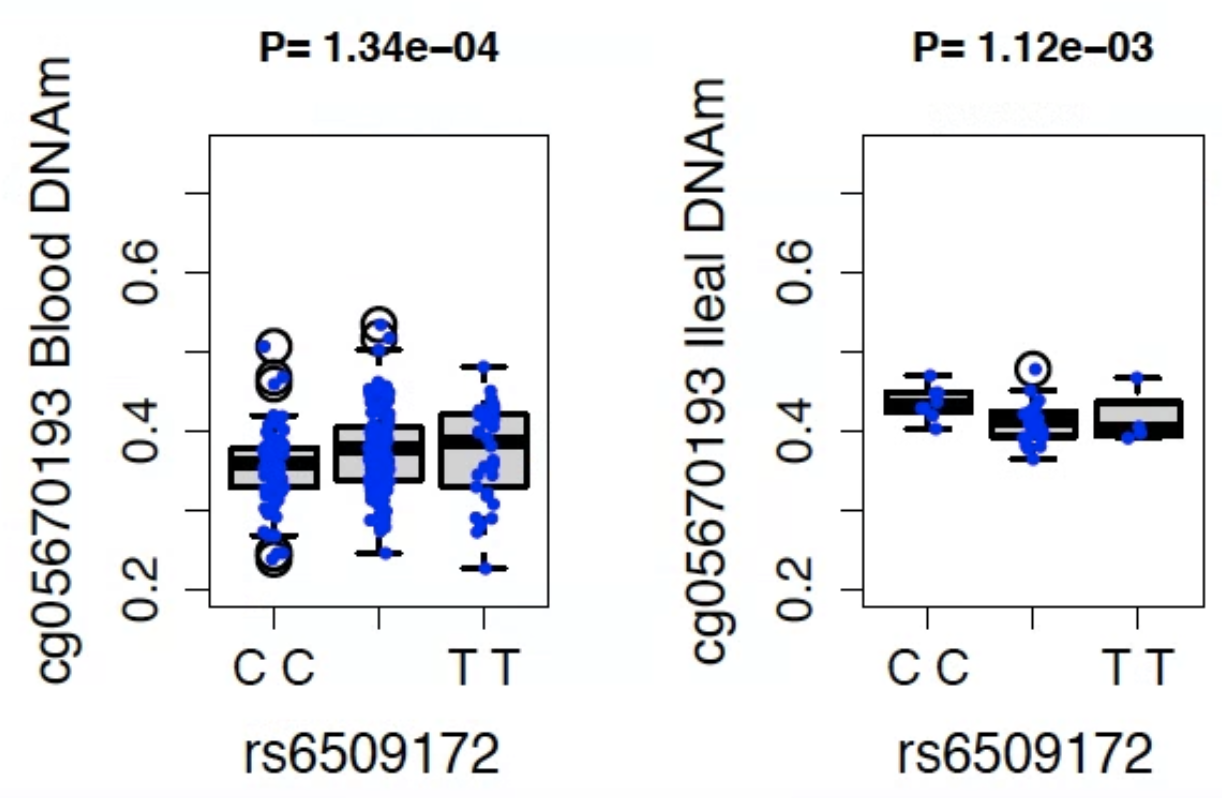 | 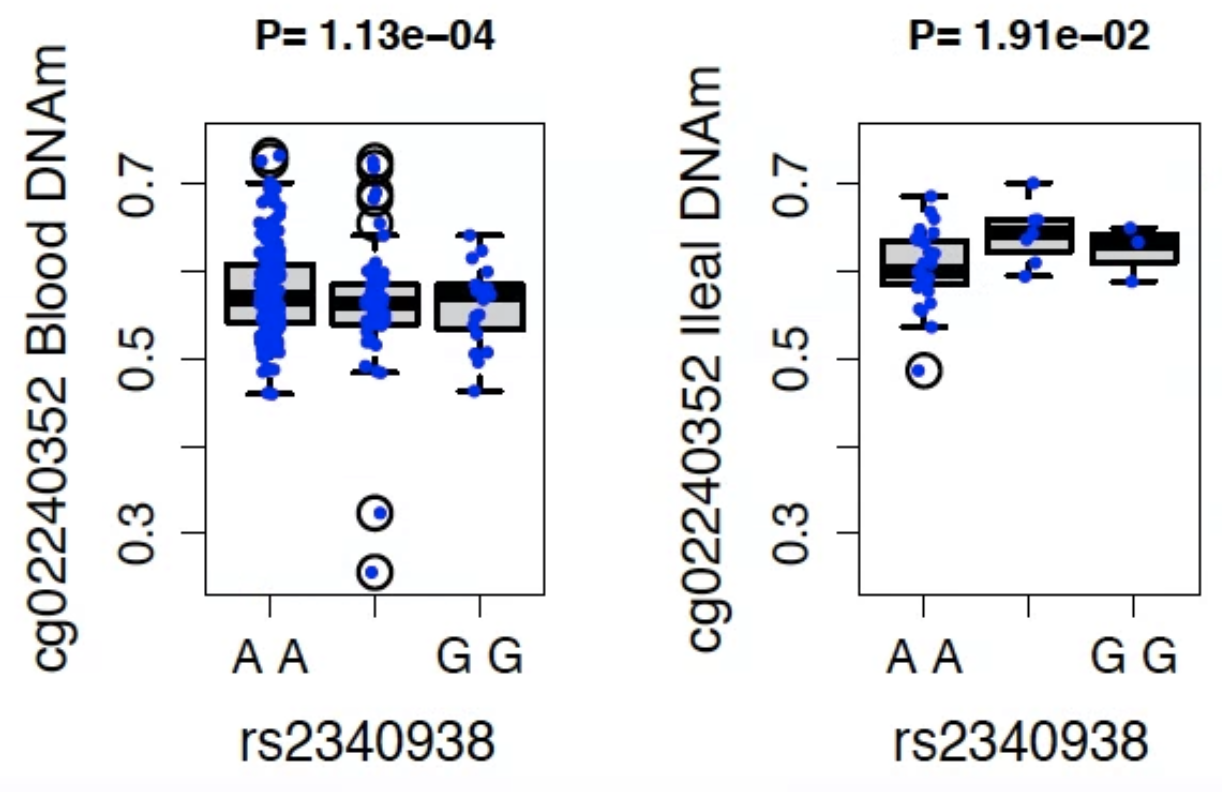 | 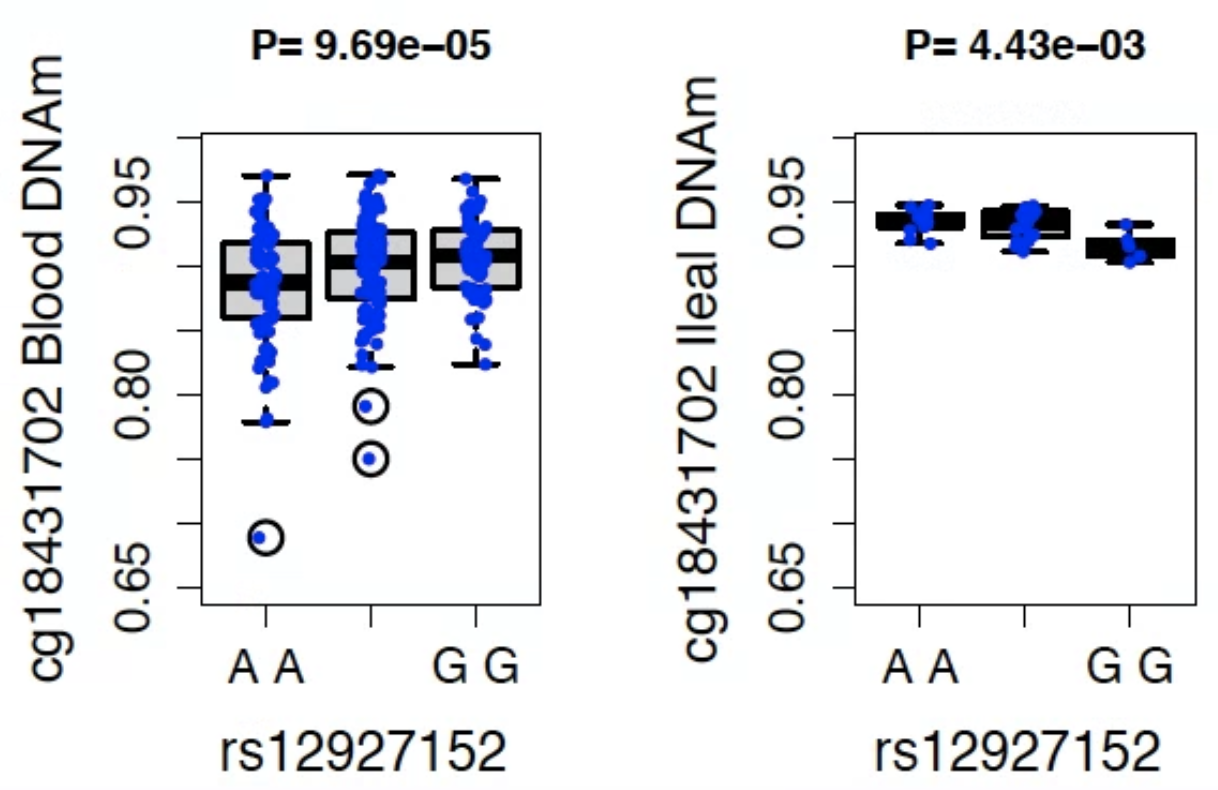 |
| --- | --- | --- |
| 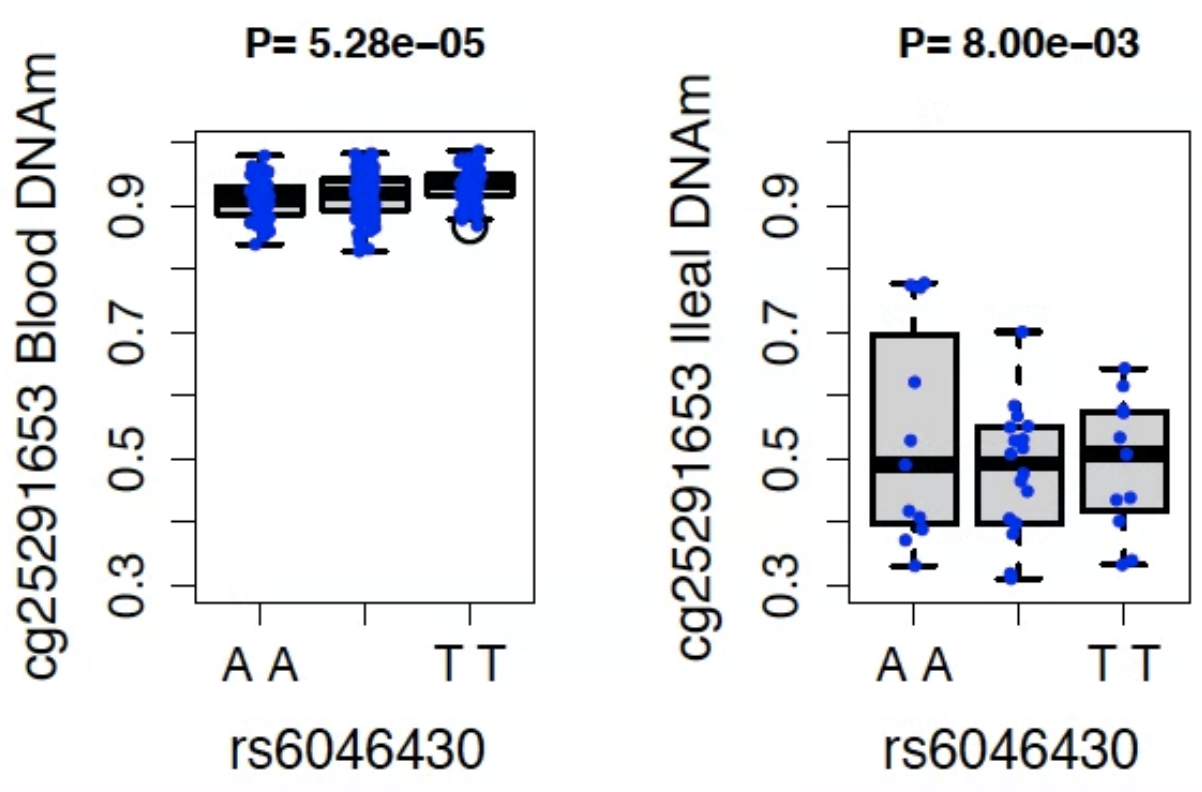 | 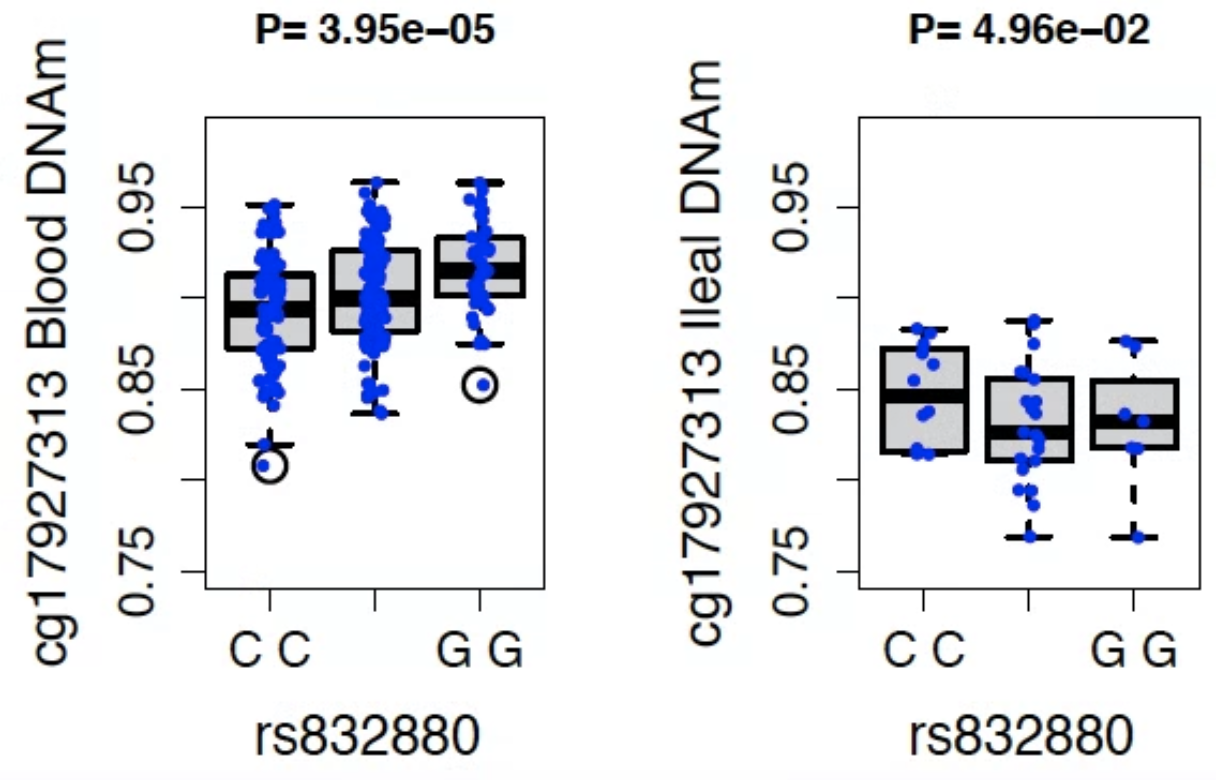 | 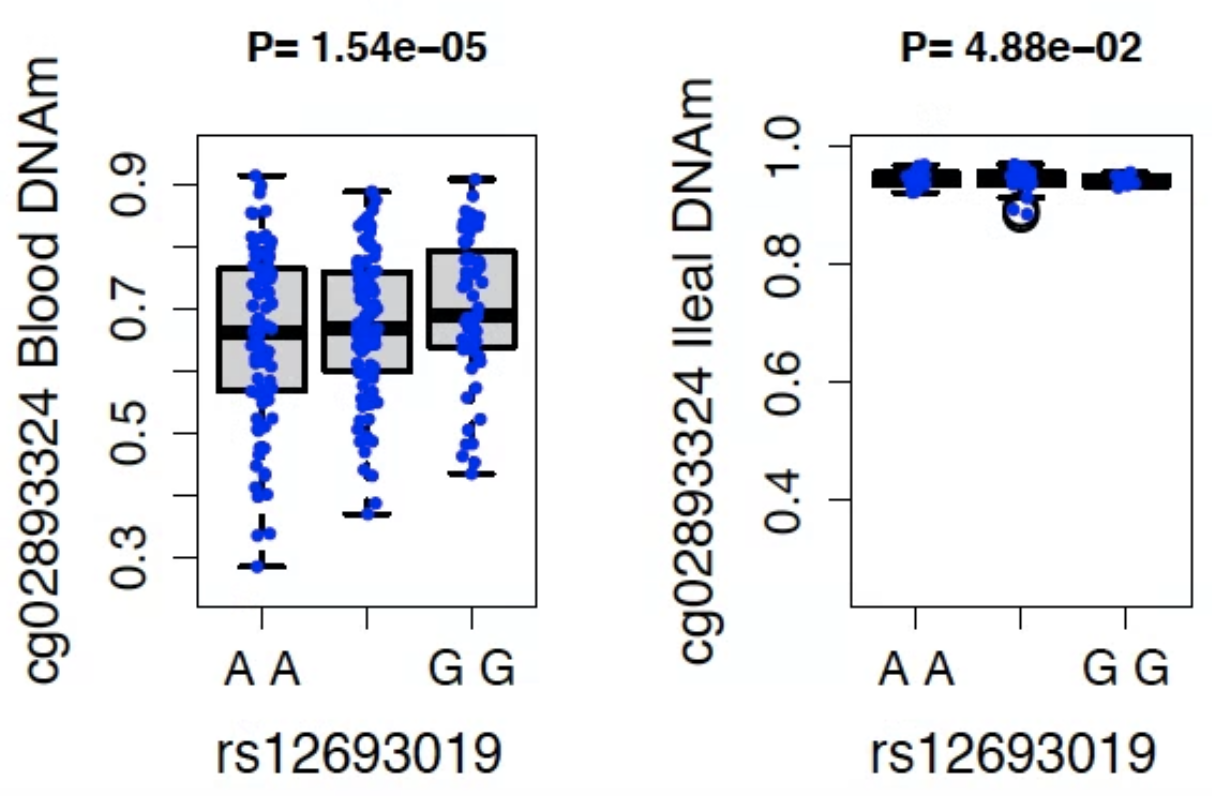 |
| 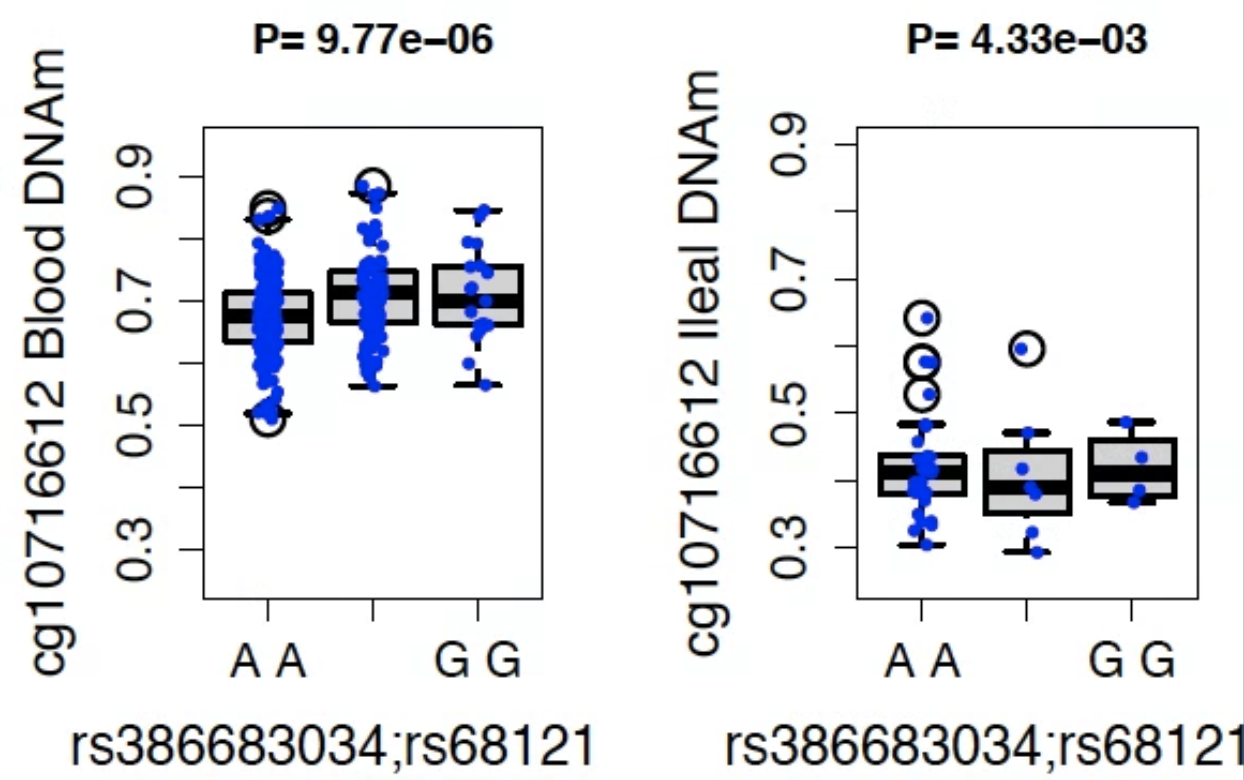 | 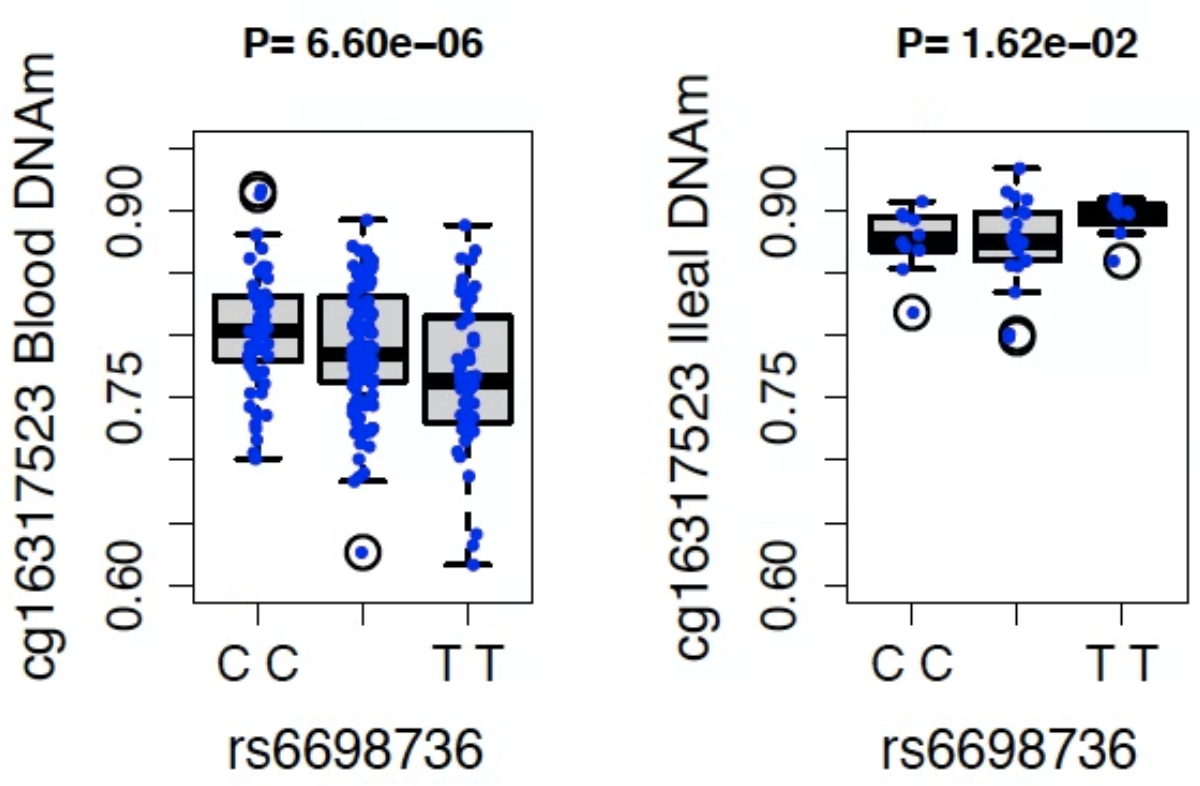 | 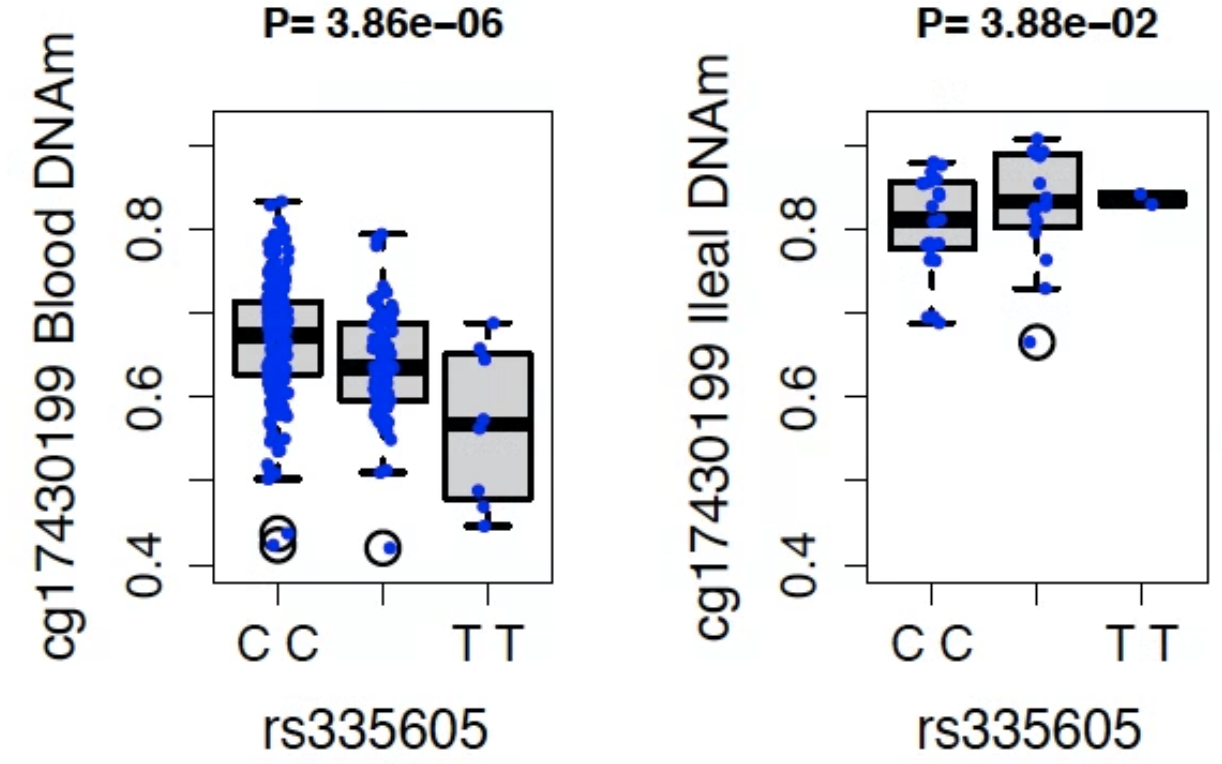 |
| 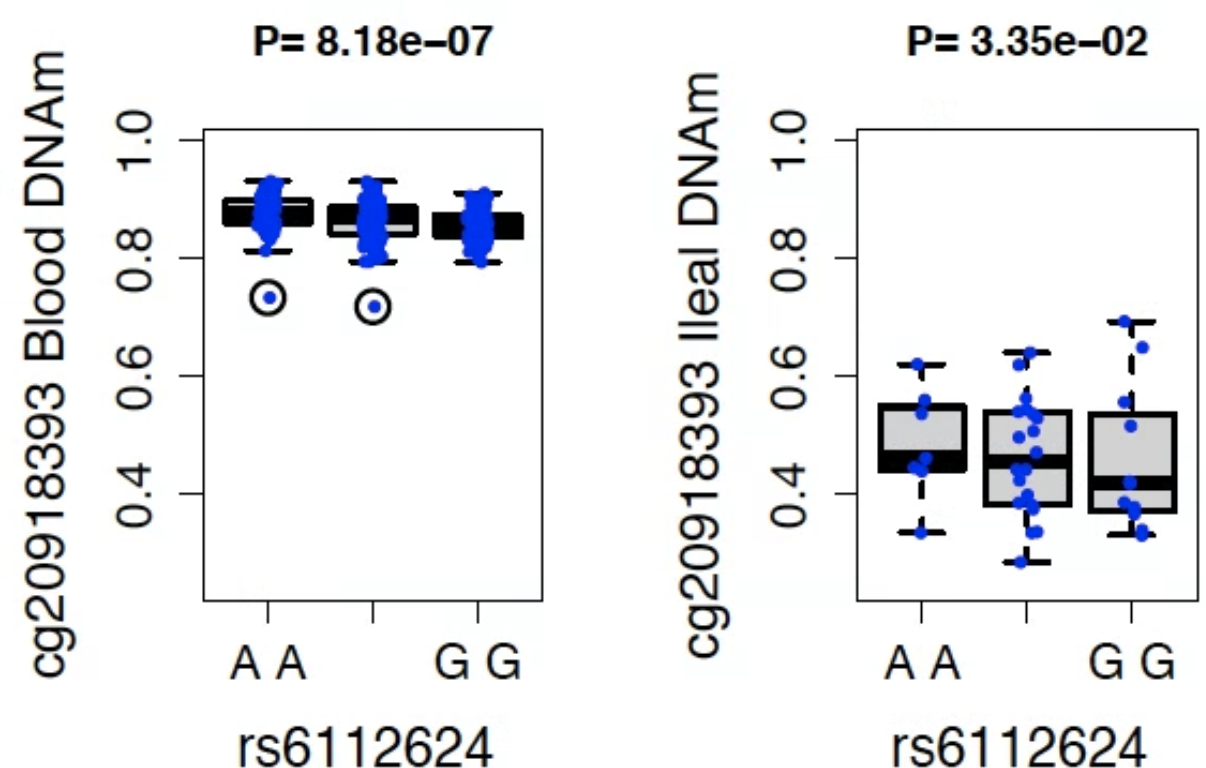 | 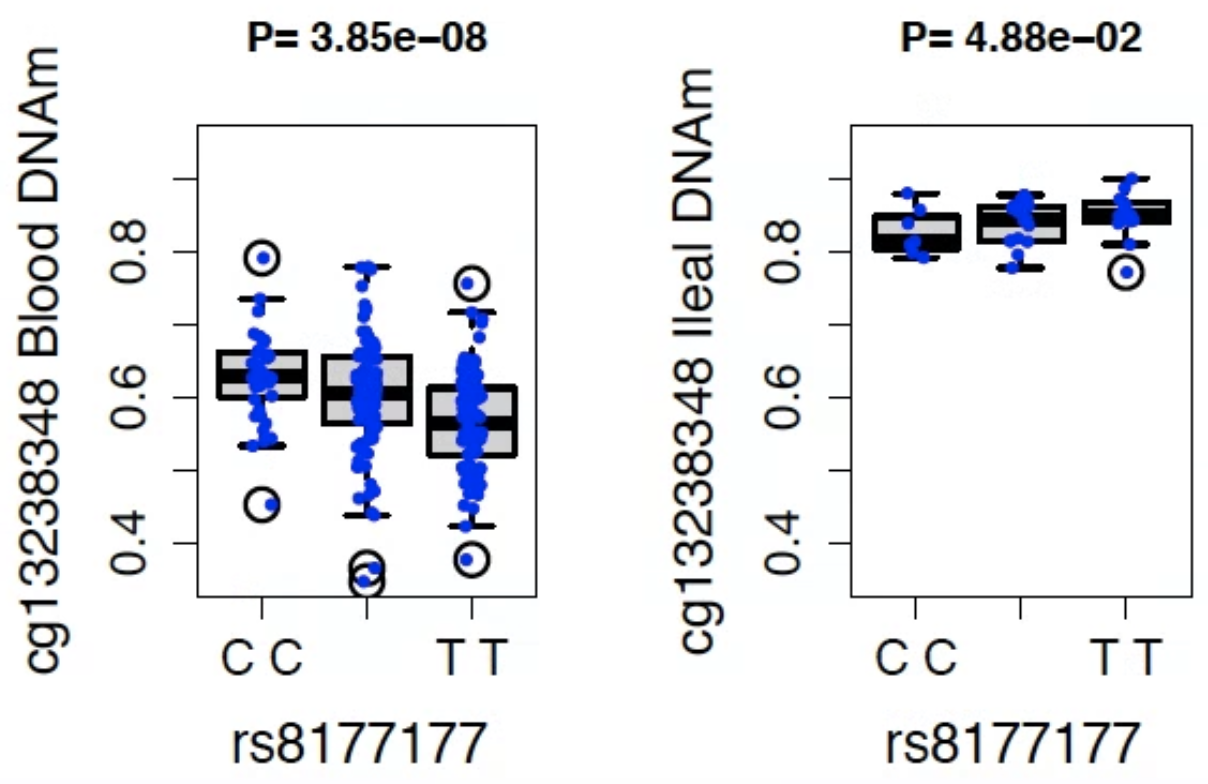 | 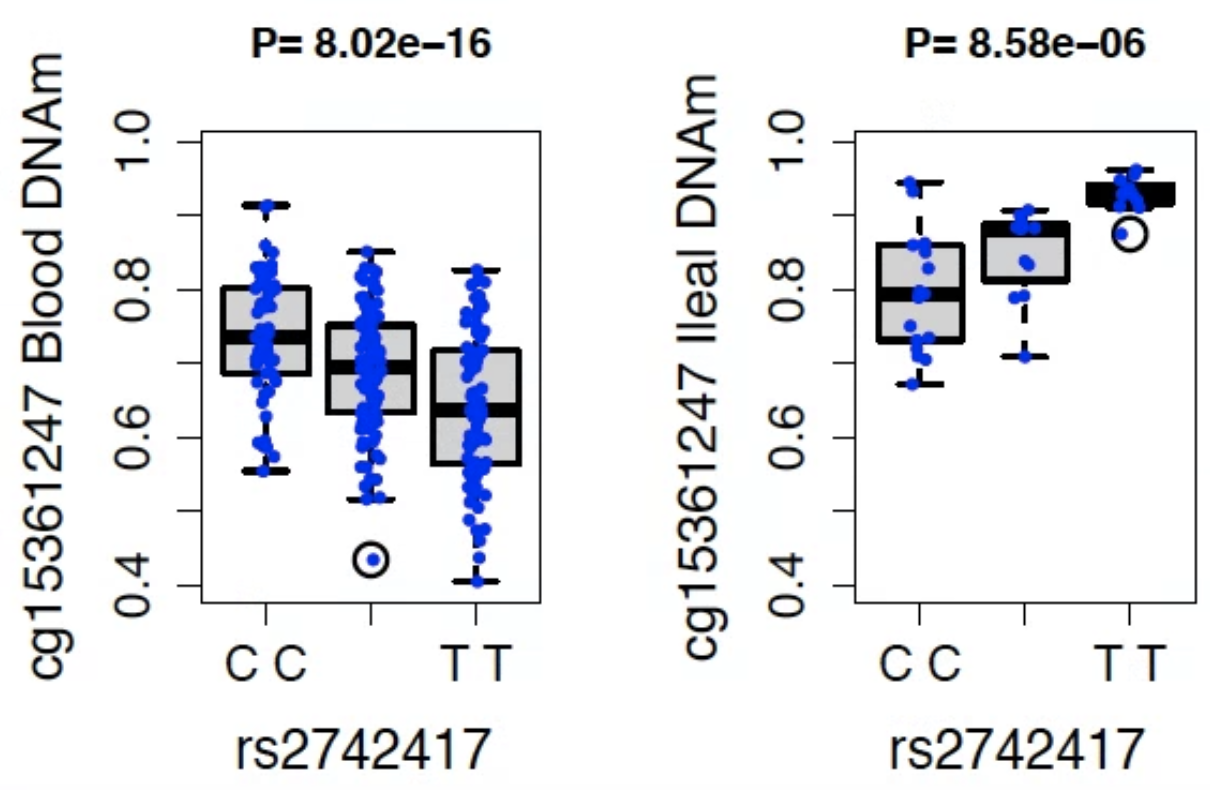 |

**Figure S3:** Boxplots show the distribution of methylation by genotype for the top SNP associated with each of 12 CD-associated CpGs. In each panel the left plot shows this distribution in blood, and the right plot shows the distribution in ileum.

**Table S1:** **Cohort description**

|  | Discovery cohort  (N=238) | Replication cohort  (N=780) | Total  (N=1018) |
| --- | --- | --- | --- |
| **Sex** | | | |
| Female | 102 (42.9%) | 556 (71.3%) | 658 (64.6%) |
| Male | 136 (57.1%) | 224 (28.7%) | 360 (35.4%) |
| **Age** | | | |
| N-Miss | 0 | 9 | 9 |
| Mean (SD) | 12.334 (3.018) | 42.263 (12.335) | 35.204 (16.733) |
| Range | 4.500 - 16.830 | 18.000 - 76.000 | 4.500 - 76.000 |
| **Race** | | | |
| African American | 40 (16.8%) | 730 (93.6%) | 770 (75.6%) |
| Caucasian | 185 (77.7%) | 25 (3.2%) | 210 (20.6%) |
| Other | 13 (5.5%) | 25 (3.2%) | 38 (3.7%) |
| **Disease status** | | | |
| Cases | 164 (68.9%) | 262 (33.6%) | 426 (41.8%) |
| Control | 74 (31.1%) | 518 (66.4%) | 592 (58.2%) |

**Table S3:** **Genomic distribution of cis mQTLs identified in blood.**

|  | Total SNPs (N=3,109,862) | Cis mQTL SNPs (N=287,881) | P-value | OR (95% CI) |
| --- | --- | --- | --- | --- |
| Downstream | 20097 (0.65) | 2982 (1.04) | < 2.20E-16 | 1.6 (1.54 - 1.67) |
| Exonic | 33433 (1.08) | 5361 (1.86) | < 2.20E-16 | 1.73 (1.68 - 1.78) |
| Intergenic | 1640000 (52.74) | 127749 (44.38) | < 2.20E-16 | 0.84 (0.84 - 0.85) |
| Intronic | 1149992 (36.98) | 123635 (42.95) | < 2.20E-16 | 1.16 (1.15 - 1.17) |
| ncRNA_exonic | 11329 (0.36) | 1584 (0.55) | < 2.20E-16 | 1.51 (1.43 - 1.59) |
| ncRNA_intronic | 200858 (6.46) | 18535 (6.44) | 6.95E-01 | 1 (0.98 - 1.01) |
| ncRNA_splicing | 76 (0) | 10 (0) | 3.28E-01 | 1.42 (0.66 - 2.76) |
| Splicing | 735 (0.02) | 131 (0.05) | 1.42E-10 | 1.93 (1.59 - 2.32) |
| Upstream | 18528 (0.6) | 3056 (1.06) | < 2.20E-16 | 1.78 (1.71 - 1.85) |
| upstream;downstream | 667 (0.02) | 167 (0.06) | < 2.20E-16 | 2.7 (2.27 - 3.21) |
| UTR3 | 28373 (0.91) | 3805 (1.32) | < 2.20E-16 | 1.45 (1.4 - 1.5) |
| UTR5 | 5748 (0.18) | 850 (0.3) | < 2.20E-16 | 1.6 (1.48 - 1.72) |
| UTR5;UTR3 | 26 (0) | 16 (0.01) | 1.37E-07 | 6.65 (3.33 - 12.87) |

Table legends: downstream (1 kb region downstream of transcription end site (TES); exonic (within the exonic region); intergenic (within the intergenic region); intronic (within the intronic region); ncRNA_exonic (transcripts without coding annotation in the gene definition, within the exonic region); ncRNA_intronic (transcripts without coding annotation in the gene definition, within the intronic region); ncRNA_splicing (transcripts without coding annotation in the gene definition, within the splicing region); splicing (within 2 bp of a splicing junction); upstream (1 kb region upstream of transcription start site (TSS); UTR3 (3′ untranslated region); and UTR5 (5′ untranslated region); P-value: Fisher’s exact test p-value; OR- Odds ratio; Values in the parenthesis in each row refer % of genomic features in each category.

**Table S4: Genomic distribution of all CpG sites on the Illumina array and CpG sites associated with cis-mQTLs.**

|  | Total CpGs (N=867,531) | Cis mQTL-associated CpGs (N=12,843) | P-value | OR (95% CI) |
| --- | --- | --- | --- | --- |
| Not Annotated | 250244 (28.85) | 4248 (33.08) | < 2.2E-16 | 1.22 (1.17 - 1.27) |
| 1stExon | 26433 (3.05) | 236 (1.84) | < 2.20E-16 | 0.6 (0.52 - 0.68) |
| 3'UTR | 21594 (2.49) | 227 (1.77) | 5.31E-08 | 0.70 (0.62 - 0.80) |
| 5'UTR | 73070 (8.42) | 980 (7.63) | 0.001 | 0.90 (0.84 - 0.96) |
| Body | 318165 (36.67) | 4524 (35.23) | 7.11E-04 | 0.94 (0.91 - 0.97) |
| ExonBnd | 5680 (0.65) | 47 (0.37) | 1.52E-05 | 0.56 (0.41 - 0.74) |
| TSS1500 | 107193 (12.36) | 1892 (14.73) | 2.55E-15 | 1.23 (1.17 - 1.29) |
| TSS200 | 65152 (7.51) | 689 (5.36) | < 2.2E-16 | 0.70 (0.65 - 0.75) |

Table legends: Not annotated – CpG sites were not annotated in Illumina Methylation EPIC array annotation file; 1stExon - gene’s first exon; 3′ UTR (3′ untranslated region); 5′ UTR (5′ untranslated region); Body (gene body); ExonBnd (exon boundaries), TSS1500 (200 to 1500 nucleotides (nt), upstream of transcription start site, TSS); TSS200 (up to 200 nt upstream of TSS); Values in the parenthesis in each row refer % of genomic features in each category.

**Table S5: Distribution of CpG Island features for all CpG sites on the Illumina array and CpG sites associated with cis-mQTLs.**

|  | Total CpGs (N=867,531) | Cis mQTL-associated CpGs (N=12,843) | P-value | OR (95% CI) |
| --- | --- | --- | --- | --- |
| Not annotated | 489387 (56.41) | 7042 (54.83) | 3.49E-04 | 0.94(0.91 – 0.97) |
| Island | 161598 (18.63) | 1634 (12.72) | < 2.2E-16 | 0.64(0.60 – 0.67) |
| N_Shelf | 32052 (3.69) | 419 (3.26) | 9.47E-03 | 0.88(0.8 - 0.97) |
| N_Shore | 83474 (9.62) | 1757 (13.68) | < 2.20E-16 | 1.49(1.41 - 1.57) |
| S_Shelf | 29759 (3.43) | 375 (2.92) | 1.36E-03 | 0.85(0.76 - 0.94) |
| S_Shore | 71261 (8.21) | 1616 (12.58) | < 2.2E-16 | 1.61(1.52 - 1.70) |

Table legends: Not annotated – CpG sites were not annotated in Illumina Methylation EPIC array annotation file; Island – CpG Island; N_shore, S_shore - 2 kb sequences, directly up- and downstream of CpG islands are called the northern and southern shore; N_shelf and S_shelf - 2 kb sequences directly adjacent to the shores are called the northern and southern shelves, respectively; Values in the parenthesis in each row refer % of CpG island features in each category.

**Table S9. Pathways enriched for genes annotated to CpG sites that show opposite-direction associations with the same SNPs between blood vs. Ileum**

| **KEGG ID** | **Pathway** | **N** | **DE** | **P.DE** | **FDR** |
| --- | --- | --- | --- | --- | --- |
| path:hsa01100 | Metabolic pathways | 1405 | 129 | 3.34E-06 | 1.11E-03 |
| path:hsa00601 | Glycosphingolipid biosynthesis - lacto and neolacto series | 27 | 7 | 1.03E-03 | 1.72E-01 |
| path:hsa04070 | Phosphatidylinositol signaling system | 99 | 17 | 3.76E-03 | 3.99E-01 |
| path:hsa04918 | Thyroid hormone synthesis | 74 | 13 | 4.79E-03 | 3.99E-01 |
| path:hsa00562 | Inositol phosphate metabolism | 74 | 12 | 1.86E-02 | 8.58E-01 |
| path:hsa04270 | Vascular smooth muscle contraction | 132 | 17 | 1.94E-02 | 8.58E-01 |
| path:hsa00514 | Other types of O-glycan biosynthesis | 22 | 5 | 2.26E-02 | 8.58E-01 |
| path:hsa04913 | Ovarian steroidogenesis | 49 | 8 | 2.64E-02 | 8.58E-01 |
| path:hsa04979 | Cholesterol metabolism | 50 | 7 | 2.99E-02 | 8.58E-01 |
| path:hsa00062 | Fatty acid elongation | 27 | 5 | 3.15E-02 | 8.58E-01 |
| path:hsa00340 | Histidine metabolism | 23 | 4 | 3.36E-02 | 8.58E-01 |
| path:hsa04912 | GnRH signaling pathway | 93 | 13 | 3.82E-02 | 8.58E-01 |
| path:hsa04064 | NF-kappa B signaling pathway | 99 | 12 | 4.40E-02 | 8.58E-01 |
| path:hsa00350 | Tyrosine metabolism | 36 | 5 | 4.96E-02 | 8.58E-01 |

Table legends: N - number of genes in the GO or KEGG term; DE - number of genes that are differentially methylated; P.DE - p-value for over-representation of the GO or KEGG term; FDR - False discovery rate

**Table S11: Pathways enriched for genes annotated to CpG sites that associate with previously-identified IBD SNPs (*P* < 8.21E-14)**

|  | Pathway | N | DE | P.DE | FDR |
| --- | --- | --- | --- | --- | --- |
| path:hsa05163 | Human cytomegalovirus infection | 225 | 6 | 5.71E-06 | 1.92E-03 |
| path:hsa04931 | Insulin resistance | 108 | 4 | 7.94E-05 | 1.34E-02 |
| path:hsa04270 | Vascular smooth muscle contraction | 132 | 4 | 1.38E-04 | 1.55E-02 |
| path:hsa05161 | Hepatitis B | 162 | 4 | 2.45E-04 | 2.06E-02 |
| path:hsa04062 | Chemokine signaling pathway | 189 | 4 | 3.88E-04 | 2.62E-02 |
| path:hsa05200 | Pathways in cancer | 529 | 6 | 7.13E-04 | 3.15E-02 |
| path:hsa05212 | Pancreatic cancer | 76 | 3 | 7.35E-04 | 3.15E-02 |
| path:hsa04914 | Progesterone-mediated oocyte maturation | 95 | 3 | 9.79E-04 | 3.15E-02 |
| path:hsa04650 | Natural killer cell mediated cytotoxicity | 124 | 3 | 1.09E-03 | 3.15E-02 |
| path:hsa04912 | GnRH signaling pathway | 93 | 3 | 1.22E-03 | 3.15E-02 |
| path:hsa04933 | AGE-RAGE signaling pathway in diabetic complications | 100 | 3 | 1.25E-03 | 3.15E-02 |
| path:hsa01521 | EGFR tyrosine kinase inhibitor resistance | 78 | 3 | 1.29E-03 | 3.15E-02 |
| path:hsa04670 | Leukocyte transendothelial migration | 111 | 3 | 1.30E-03 | 3.15E-02 |
| path:hsa04666 | Fc gamma R-mediated phagocytosis | 92 | 3 | 1.33E-03 | 3.15E-02 |
| path:hsa04114 | Oocyte meiosis | 124 | 3 | 1.53E-03 | 3.15E-02 |
| path:hsa04070 | Phosphatidylinositol signaling system | 99 | 3 | 1.55E-03 | 3.15E-02 |
| path:hsa04066 | HIF-1 signaling pathway | 109 | 3 | 1.59E-03 | 3.15E-02 |
| path:hsa04928 | Parathyroid hormone synthesis, secretion and action | 106 | 3 | 2.34E-03 | 4.38E-02 |

Table legends: N - number of genes in the GO or KEGG term; DE - number of genes that are differentially methylated; P.DE - p-value for over-representation of the GO or KEGG term; FDR - False discovery rate

**Table S12: Pathways enriched for genes annotated to CpGs associated with previously-identified IBD SNPs (FDR < 0.05)**

|  | Pathway | N | DE | P.DE | FDR |
| --- | --- | --- | --- | --- | --- |
| path:hsa05140 | Leishmaniasis | 74 | 6 | 3.44E-05 | 1.16E-02 |
| path:hsa04650 | Natural killer cell mediated cytotoxicity | 124 | 6 | 3.70E-04 | 4.58E-02 |
| path:hsa05200 | Pathways in cancer | 529 | 14 | 4.73E-04 | 4.58E-02 |
| path:hsa04114 | Oocyte meiosis | 124 | 6 | 7.99E-04 | 4.58E-02 |
| path:hsa04010 | MAPK signaling pathway | 295 | 10 | 8.23E-04 | 4.58E-02 |
| path:hsa04380 | Osteoclast differentiation | 127 | 6 | 8.57E-04 | 4.58E-02 |
| path:hsa04072 | Phospholipase D signaling pathway | 147 | 7 | 9.52E-04 | 4.58E-02 |
| path:hsa05235 | PD-L1 expression and PD-1 checkpoint pathway in cancer | 89 | 5 | 1.60E-03 | 6.72E-02 |
| path:hsa05321 | Inflammatory bowel disease (IBD) | 63 | 4 | 1.82E-03 | 6.81E-02 |
| path:hsa04912 | GnRH signaling pathway | 93 | 5 | 2.18E-03 | 7.12E-02 |
| path:hsa04666 | Fc gamma R-mediated phagocytosis | 92 | 5 | 2.32E-03 | 7.12E-02 |
| path:hsa05161 | Hepatitis B | 162 | 6 | 3.17E-03 | 8.07E-02 |
| path:hsa04070 | Phosphatidylinositol signaling system | 99 | 5 | 3.37E-03 | 8.07E-02 |
| path:hsa04670 | Leukocyte transendothelial migration | 111 | 5 | 3.44E-03 | 8.07E-02 |
| path:hsa05231 | Choline metabolism in cancer | 98 | 5 | 3.72E-03 | 8.07E-02 |
| path:hsa04066 | HIF-1 signaling pathway | 109 | 5 | 3.83E-03 | 8.07E-02 |
| path:hsa05163 | Human cytomegalovirus infection | 225 | 7 | 4.33E-03 | 8.59E-02 |
| path:hsa00603 | Glycosphingolipid biosynthesis - globo and isoglobo series | 15 | 2 | 6.82E-03 | 1.20E-01 |
| path:hsa04630 | JAK-STAT signaling pathway | 158 | 5 | 6.88E-03 | 1.20E-01 |
| path:hsa04060 | Cytokine-cytokine receptor interaction | 289 | 6 | 7.12E-03 | 1.20E-01 |
| path:hsa05170 | Human immunodeficiency virus 1 infection | 211 | 6 | 1.01E-02 | 1.63E-01 |
| path:hsa01521 | EGFR tyrosine kinase inhibitor resistance | 78 | 4 | 1.12E-02 | 1.71E-01 |
| path:hsa04914 | Progesterone-mediated oocyte maturation | 95 | 4 | 1.21E-02 | 1.71E-01 |
| path:hsa04020 | Calcium signaling pathway | 191 | 6 | 1.24E-02 | 1.71E-01 |
| path:hsa04727 | GABAergic synapse | 89 | 4 | 1.27E-02 | 1.71E-01 |
| path:hsa05152 | Tuberculosis | 177 | 5 | 1.39E-02 | 1.81E-01 |
| path:hsa04933 | AGE-RAGE signaling pathway in diabetic complications | 100 | 4 | 1.56E-02 | 1.95E-01 |
| path:hsa04659 | Th17 cell differentiation | 105 | 4 | 1.84E-02 | 2.09E-01 |
| path:hsa04750 | Inflammatory mediator regulation of TRP channels | 100 | 4 | 1.93E-02 | 2.09E-01 |
| path:hsa04931 | Insulin resistance | 108 | 4 | 2.05E-02 | 2.09E-01 |
| path:hsa04062 | Chemokine signaling pathway | 189 | 5 | 2.05E-02 | 2.09E-01 |
| path:hsa05131 | Shigellosis | 233 | 6 | 2.09E-02 | 2.09E-01 |
| path:hsa04015 | Rap1 signaling pathway | 210 | 6 | 2.11E-02 | 2.09E-01 |
| path:hsa04310 | Wnt signaling pathway | 160 | 5 | 2.26E-02 | 2.09E-01 |
| path:hsa00601 | Glycosphingolipid biosynthesis - lacto and neolacto series | 27 | 2 | 2.27E-02 | 2.09E-01 |
| path:hsa04370 | VEGF signaling pathway | 59 | 3 | 2.27E-02 | 2.09E-01 |
| path:hsa05145 | Toxoplasmosis | 110 | 4 | 2.30E-02 | 2.09E-01 |
| path:hsa00630 | Glyoxylate and dicarboxylate metabolism | 30 | 2 | 2.79E-02 | 2.47E-01 |
| path:hsa05031 | Amphetamine addiction | 69 | 3 | 3.07E-02 | 2.51E-01 |
| path:hsa04071 | Sphingolipid signaling pathway | 118 | 4 | 3.07E-02 | 2.51E-01 |
| path:hsa04720 | Long-term potentiation | 67 | 3 | 3.13E-02 | 2.51E-01 |
| path:hsa05135 | Yersinia infection | 120 | 4 | 3.15E-02 | 2.51E-01 |
| path:hsa04270 | Vascular smooth muscle contraction | 132 | 4 | 3.20E-02 | 2.51E-01 |
| path:hsa04935 | Growth hormone synthesis, secretion and action | 119 | 4 | 3.49E-02 | 2.66E-01 |
| path:hsa04620 | Toll-like receptor signaling pathway | 104 | 3 | 3.55E-02 | 2.66E-01 |
| path:hsa04714 | Thermogenesis | 218 | 5 | 3.81E-02 | 2.79E-01 |
| path:hsa05214 | Glioma | 75 | 3 | 4.09E-02 | 2.92E-01 |
| path:hsa04371 | Apelin signaling pathway | 137 | 4 | 4.20E-02 | 2.92E-01 |
| path:hsa04971 | Gastric acid secretion | 75 | 3 | 4.26E-02 | 2.92E-01 |
| path:hsa05212 | Pancreatic cancer | 76 | 3 | 4.33E-02 | 2.92E-01 |

Table legends: N - number of genes in the GO or KEGG term; DE - number of genes that are differentially methylated; P.DE - p-value for over-representation of the GO or KEGG term; FDR - False discovery rate
